# Supplementary material for: Structural Characterization, DFT Calculation, NCI, Scan-Rate Analysis and Antifungal Activity against Botrytis cinerea of (E)-2-{[(2-Aminopyridin-2-yl)imino]-methyl}-4,6-di-tert-butylphenol (Pyridine Schiff Base)
Source: PubMed Central journal article supplement (PMC7357110; doi:10.3390/molecules25122741), 2020-06-13
Supplement: molecules-25-02741-s001.pdf [file molecules-25-02741-s001.pdf]

Supplementary Materials

# Structural Characterization, DFT Calculation, NCI, Scan-Rate Analysis and Antifungal Activity Against *Botrytis cinerea* of (E)-2-[[2-Aminopyridin-2-yl)imino]-methyl]-4,6-di-*tert*-butylphenol (Pyridine Schiff Base)

Alexander Carreño <sup>1,2,\*</sup>, Dayán Páez-Hernández <sup>1</sup>, Plinio Cantero-López <sup>1</sup>, César Zúñiga <sup>3,4</sup>, Jan Nevermann <sup>5</sup>, Angélica Ramírez-Osorio <sup>2</sup>, Manuel Gacitúa <sup>6</sup>, Poldie Oyarzún <sup>7</sup>, Felipe Sáez-Cortez <sup>8</sup>, Rubén Polanco <sup>8</sup>, Carolina Otero <sup>9</sup> and Juan A. Fuentes <sup>5,\*</sup>

- <sup>1</sup> Center of Applied Nanosciences (CANS), Facultad de Ciencias Exactas, Universidad Andres Bello, República 330, 8370186, Santiago, Chile; alexander.carreno@unab.cl (A.C.); dayan.paez@unab.cl (D.P.-H.); pliniocantero@gmail.com (P.C.-L.)
  - <sup>2</sup> FONDECYT de Inicio 11170637, Facultad de Ciencias Exactas, Universidad Andres Bello, República 330, 8370186, Santiago, Chile; alexander.carreno@unab.cl (A.C.); angelicamosorio@gmail.com (A.R.-O.)
  - <sup>3</sup> Instituto de Ciencias Naturales, Facultad de Medicina Veterinaria y Agronomía, Universidad de Las Américas, Sede Providencia, Manuel Montt 948, 7500972, Santiago, Chile; cesar.zuniga.c@gmail.com
  - <sup>4</sup> Facultad de Ciencias de la Salud, Universidad Central de Chile, Lord Cochrane 417, 8330507, Santiago, Chile; cesar.zuniga.c@gmail.com
  - <sup>5</sup> Laboratorio de Genética y Patogénesis Bacteriana, Facultad de Ciencias de la Vida, Universidad Andres Bello, República 330, 8370186, Santiago, Chile; jnevermannschell@gmail.com (J.N.); jfuentes@unab.cl (J.A.F.)
  - <sup>6</sup> Facultad de Química y Biología, USACH, Av. L.B. O'Higgins 3363, 7254758, Santiago, Chile; manuelgacitua@gmail.com
  - <sup>7</sup> Laboratorio de Análisis de Sólido (LAS), Facultad de Ingeniería y Facultad de Ciencias Exactas, Universidad Andrés Bello, República 330, 8370186, Santiago, Chile; poldie.oyarzun@unab.cl
  - <sup>8</sup> Centro de Biotecnología Vegetal (CBV), Laboratorio de Fitopatógenos Fúngicos, Facultad de Ciencias de la Vida, Universidad Andres Bello, República 330, 8370186, Santiago, Chile; fs.cortez92@gmail.com (F.S.-C.); rpolanco@unab.cl (R.P.)
  - <sup>9</sup> Escuela de Química y Farmacia, Facultad de Medicina, Universidad Andres Bello, República 252, 8320000, Santiago, Chile; maria.otero@unab.cl
- \* Correspondence: alexander.carreno@unab.cl (A.C.); jfuentes@unab.cl (J.A.F.)

## Supplementary Figures

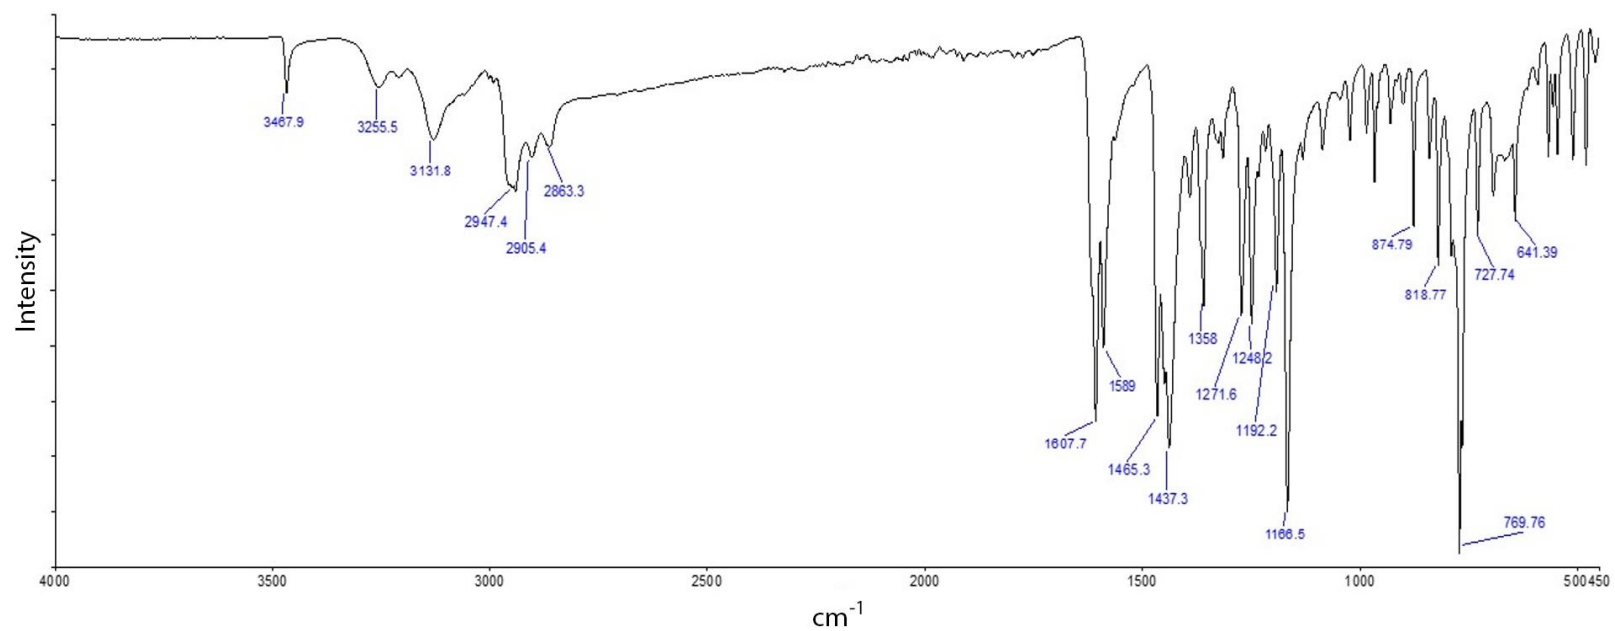

**Figure S1.** FTIR spectrum of L1.

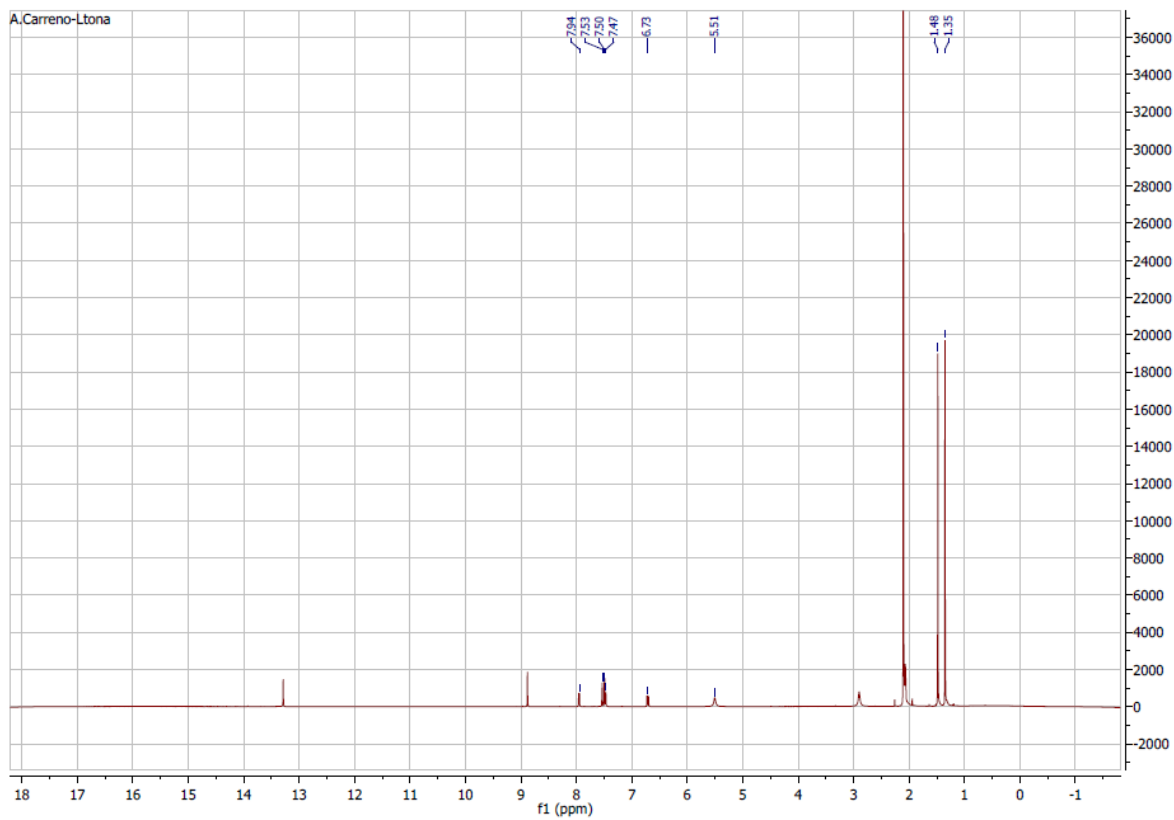

Figure S2. <sup>1</sup>H NMR spectrum of L1 in acetone-d<sub>6</sub> at 25 °C.

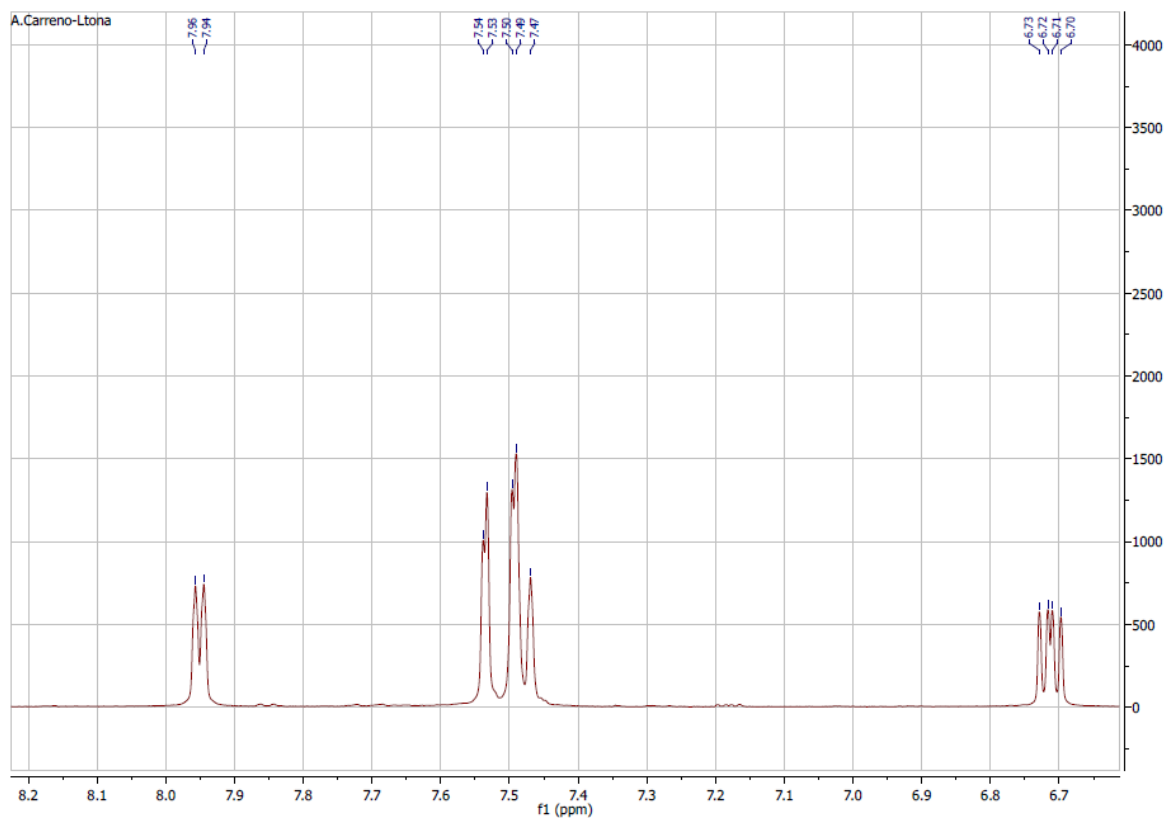

**Figure S3.** Aromatic expanded of  $^1\text{H}$ NMR of L1 in acetone- $d_6$  at 25 °C.

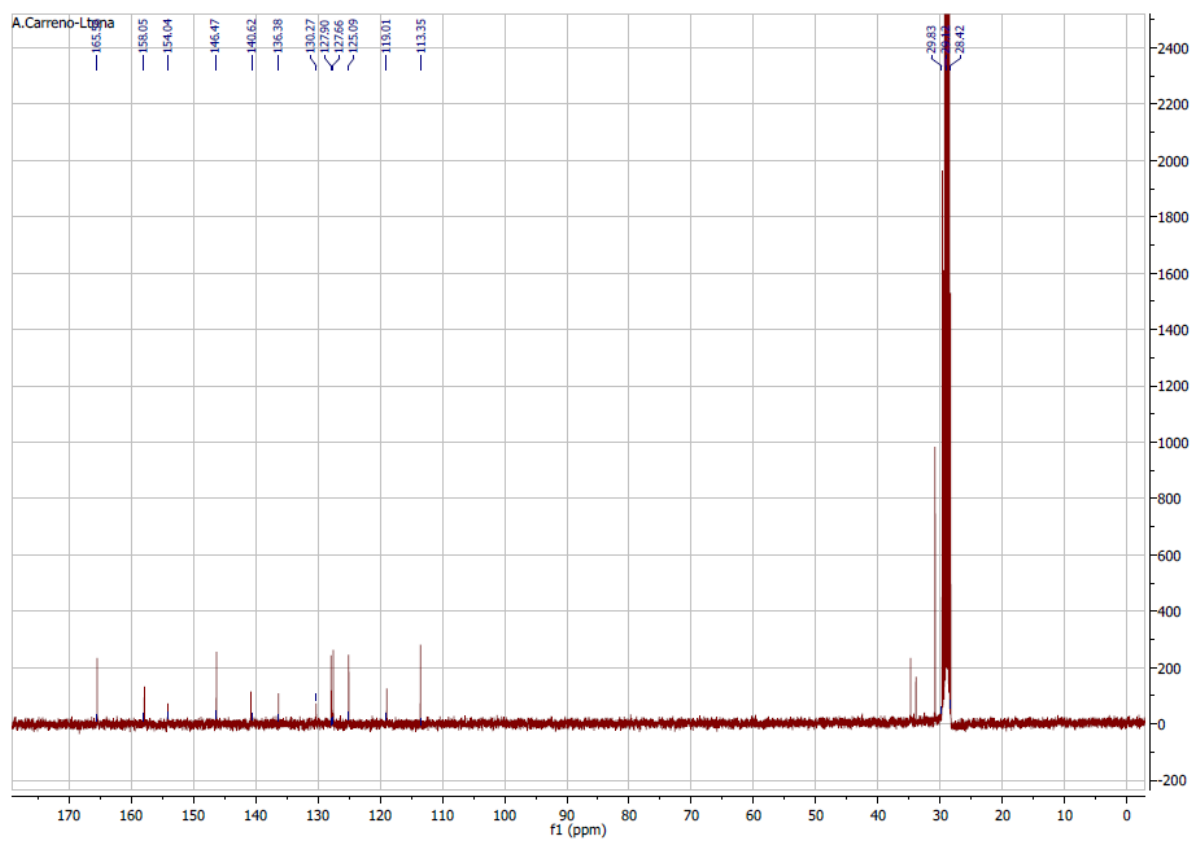

**Figure S4.**  $^{13}\text{C}$ NMR spectrum of L1 in acetone- $d_6$  at 25 °C.

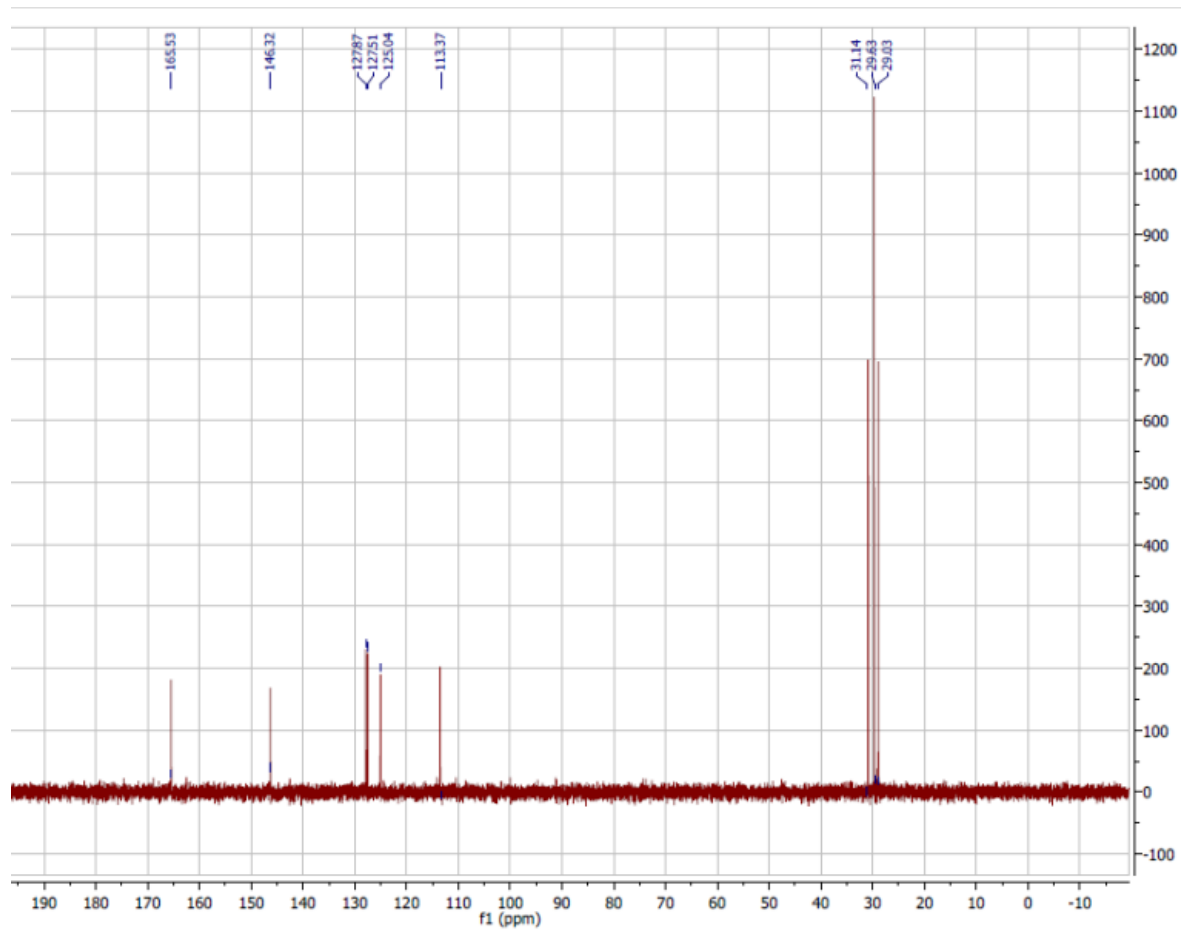

Figure S5. DEPT spectrum of L1 in acetone-d<sub>6</sub> at 25 °C.

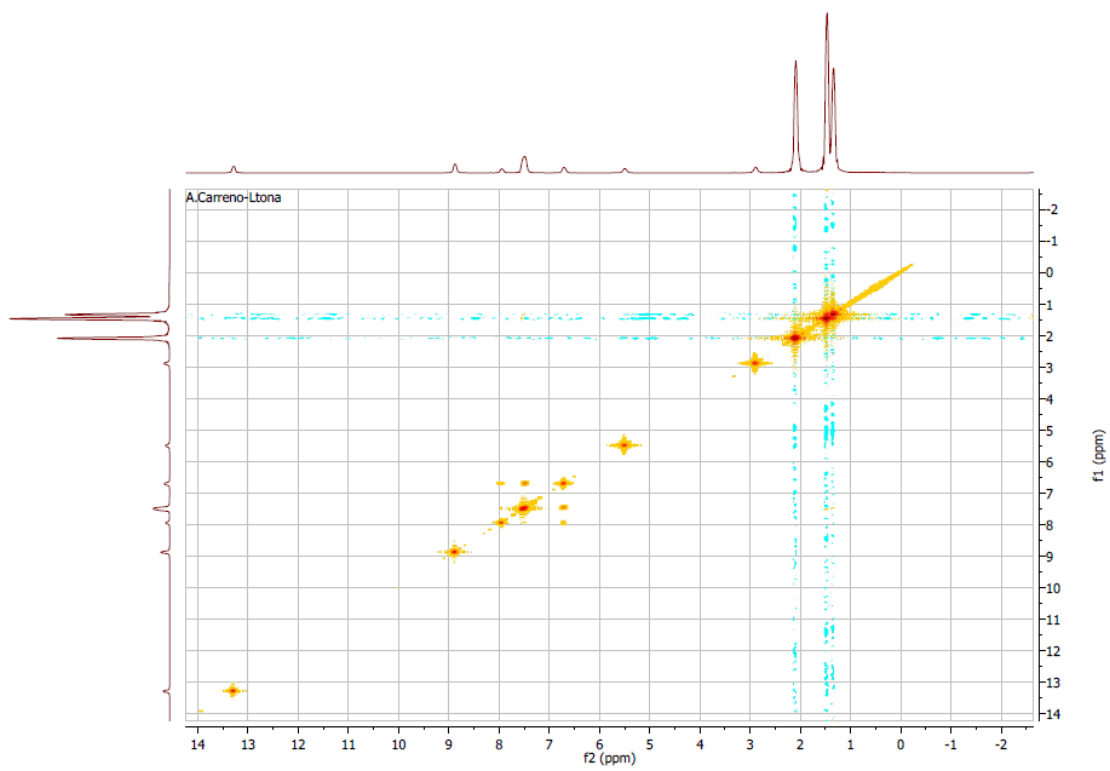

**Figure S6.** HHCOSY spectrum of **L1** in acetone- $d_6$  at 25 °C.

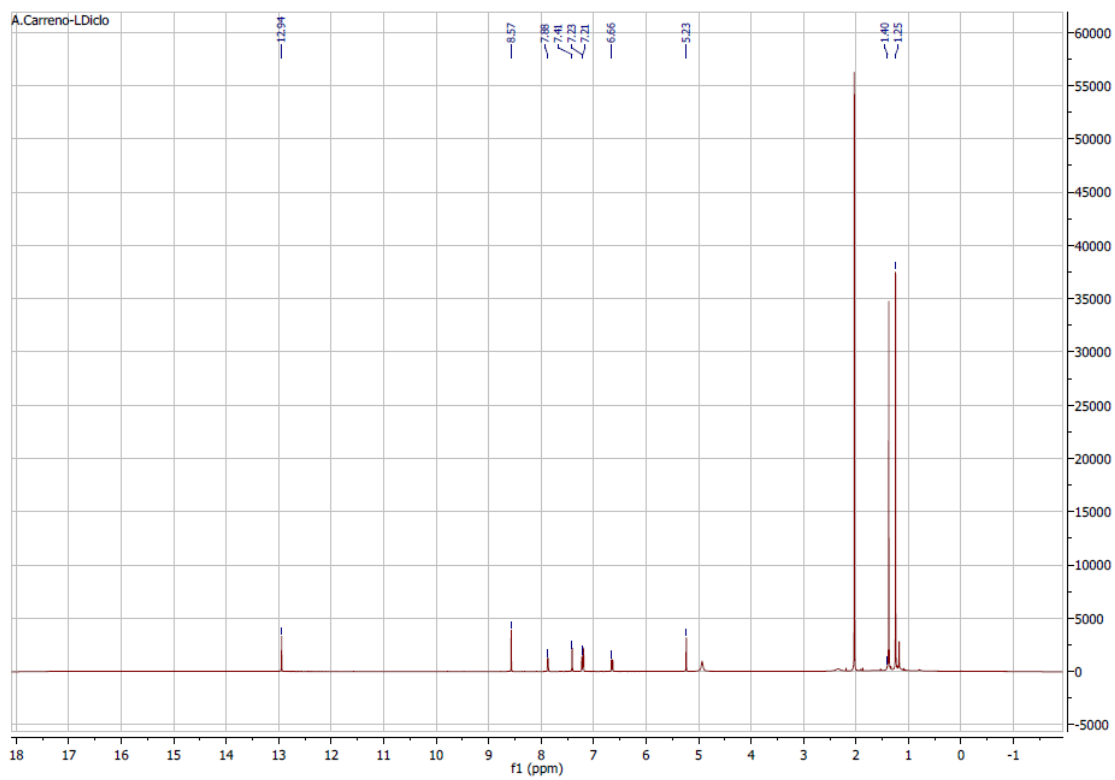

Figure S7.  $^1\text{H}$ NMR spectrum of **L1** in  $\text{CD}_2\text{Cl}_2$  at 25  $^\circ\text{C}$ .



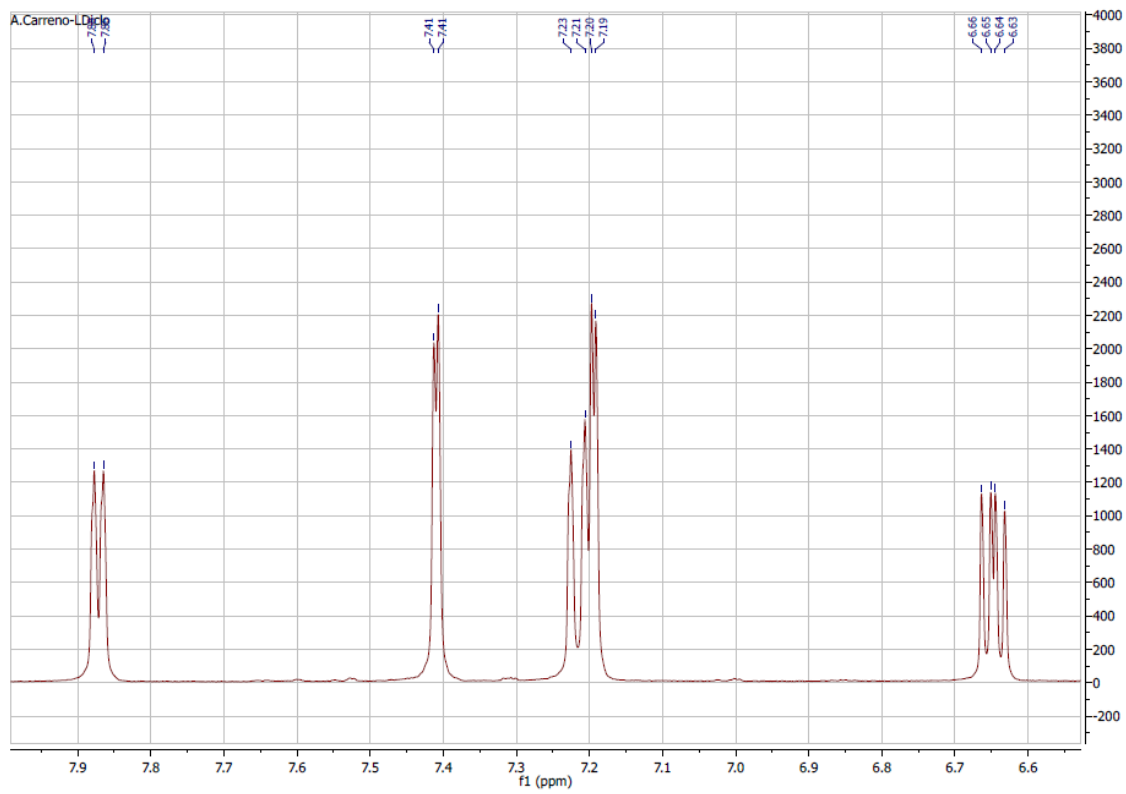

**Figure S8.** Aromatic expanded of  $^1\text{H}$ NMR of L1 in  $\text{CD}_2\text{Cl}_2$  at  $25^\circ\text{C}$ .

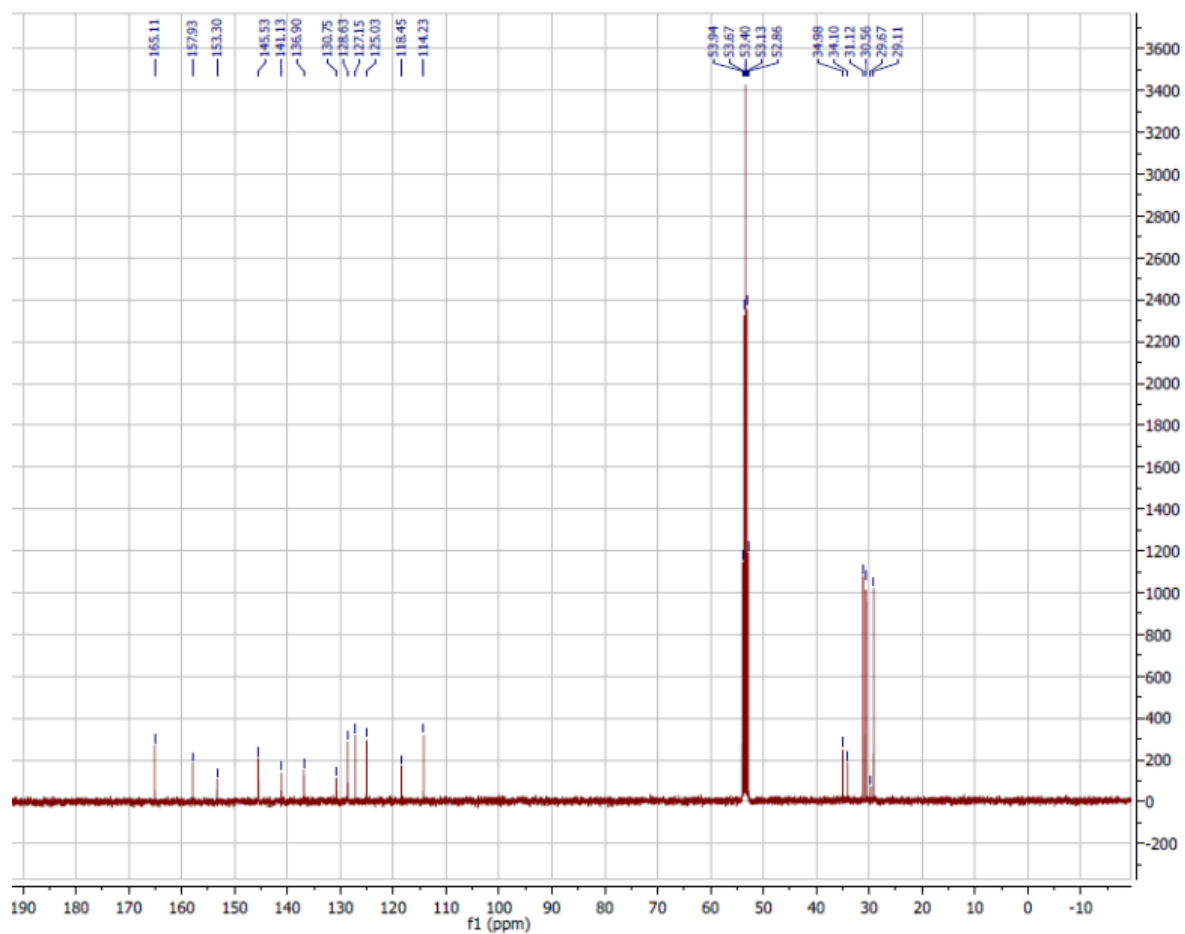

Figure S9.  $^{13}\text{C}$ NMR spectrum of L1 in  $\text{CD}_2\text{Cl}_2$  at  $25^\circ\text{C}$ .

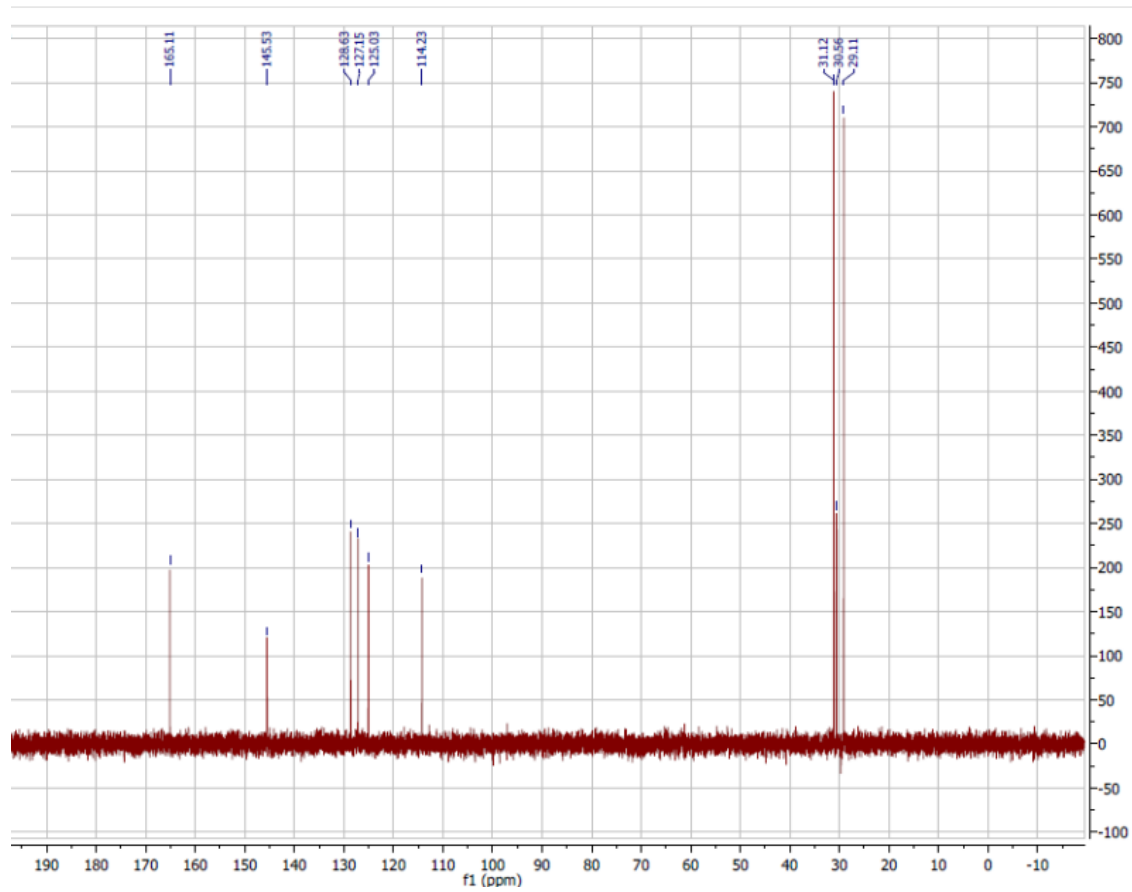

Figure S10. DEPT spectrum of L1 in CD<sub>2</sub>Cl<sub>2</sub> at 25 °C.

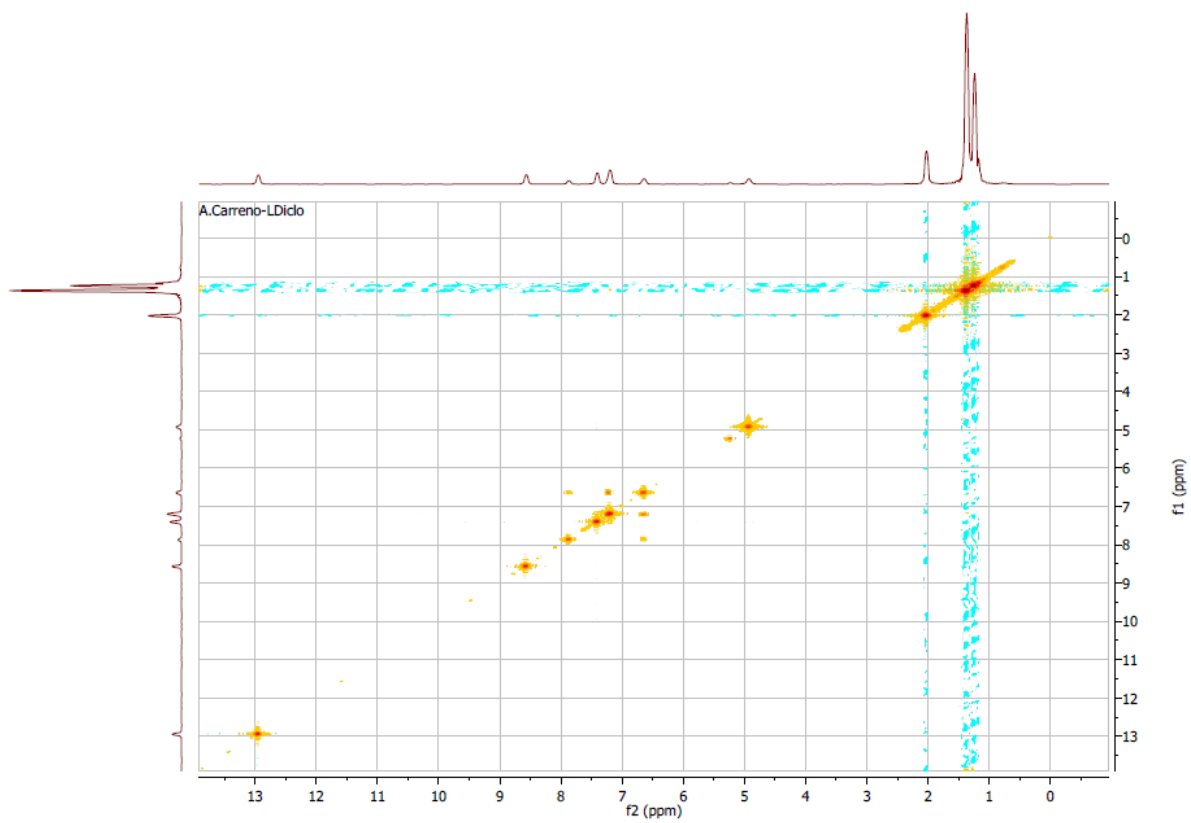

**Figure S11.** HHCOSY spectrum of L1 in CD<sub>2</sub>Cl<sub>2</sub> at 25 °C.

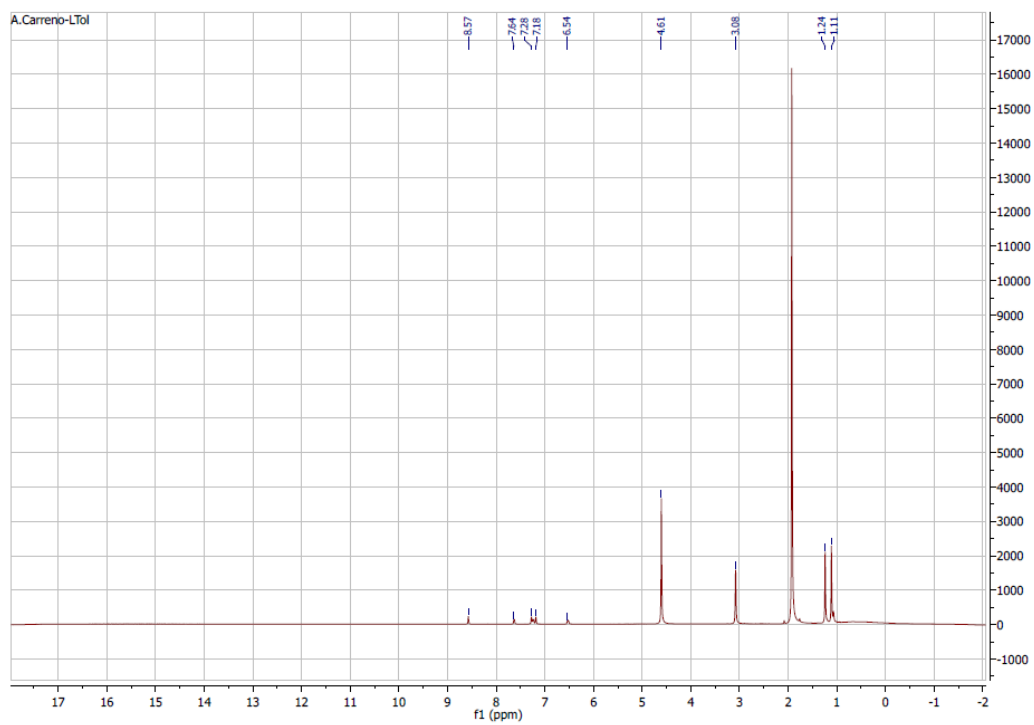

**Figure S12.**  $^1\text{H}$ NMR spectrum of L1 in methanol- $d_4$  at 25 °C.

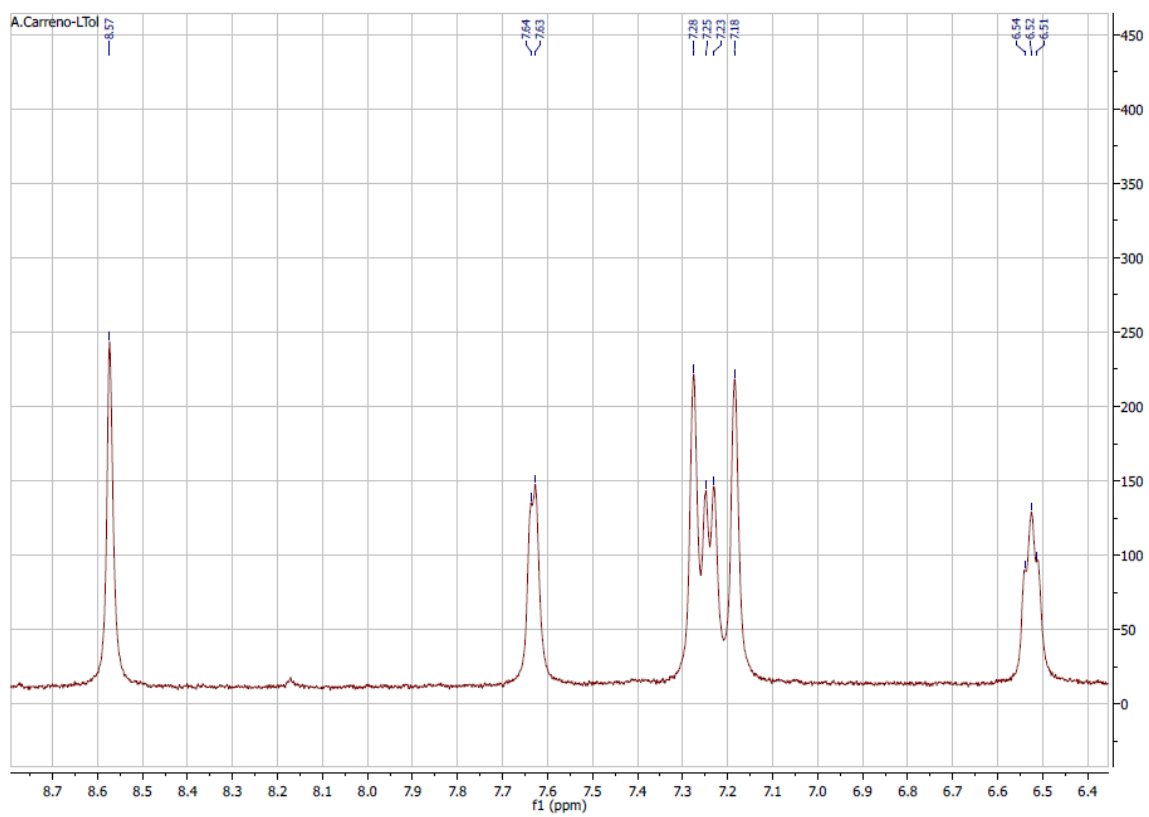

**Figure S13.** Aromatic expanded of  $^1\text{H}$ NMR of L1 in methanol- $d_4$  at 25 °C.

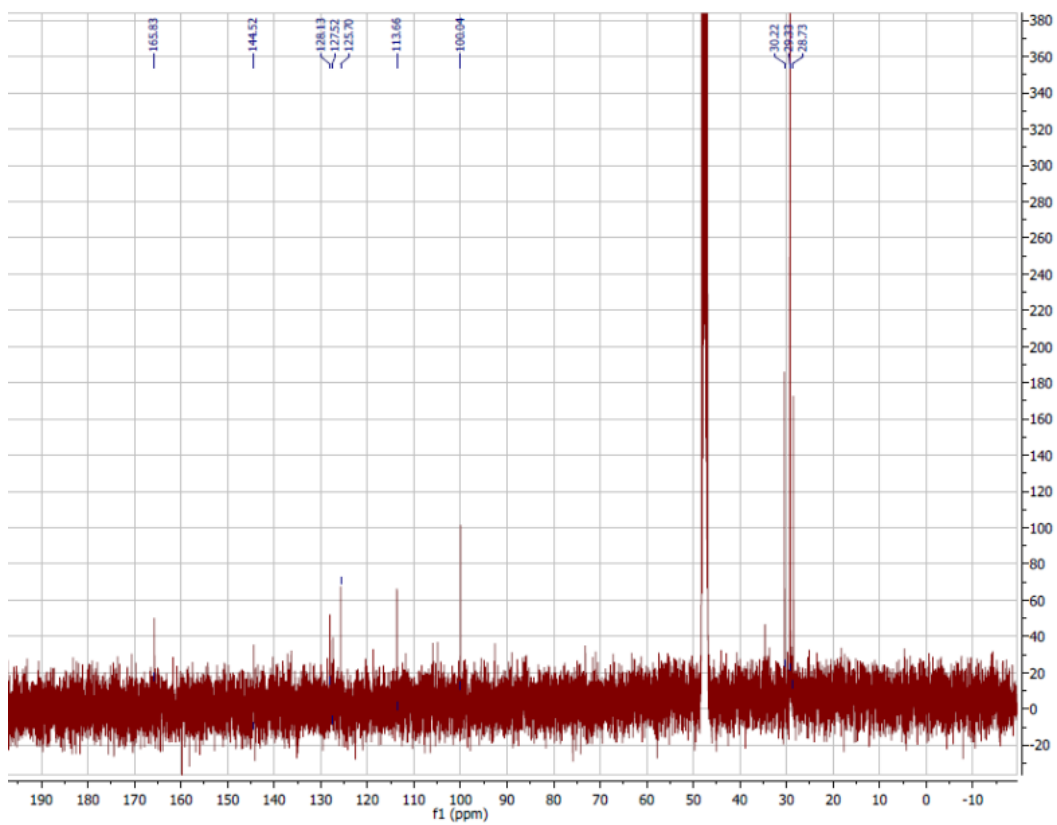

Figure S14.  $^{13}\text{C}$ NMR spectrum of L1 in methanol- $d_4$  at 25 °C.

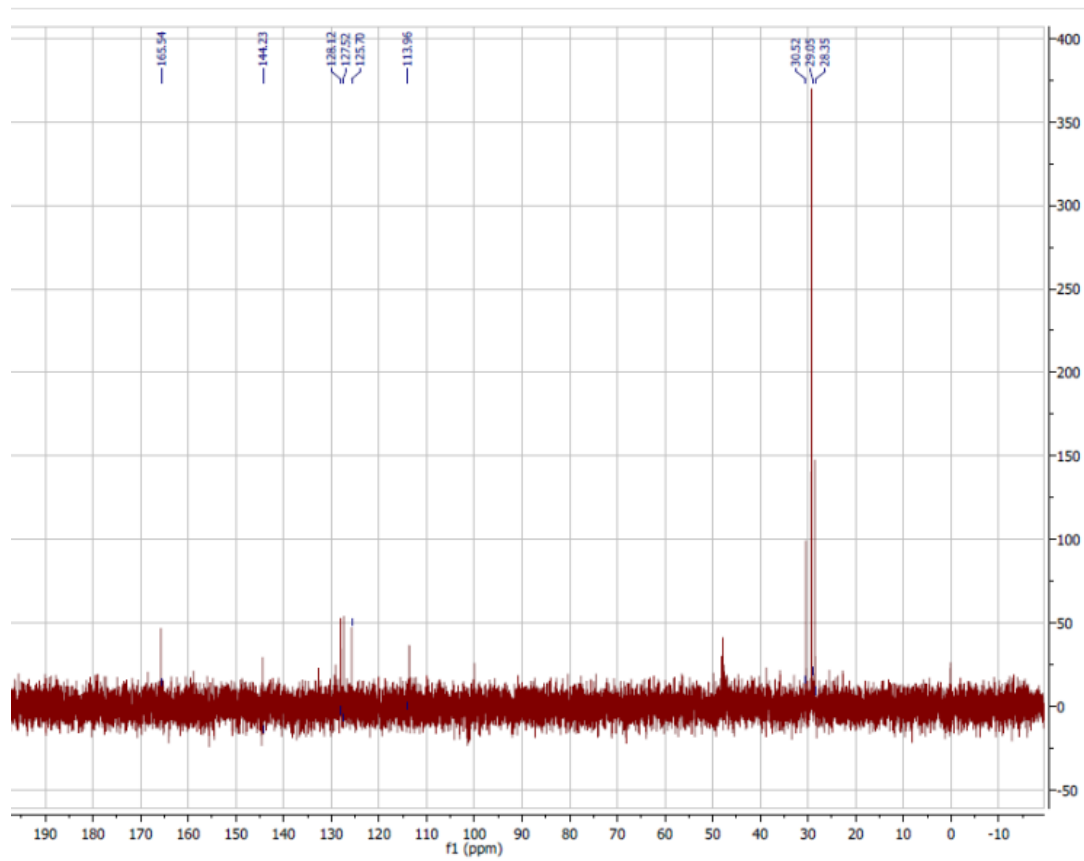

Figure S15. DEPT spectrum of L1 in methanol- $d_4$  at 25 °C.



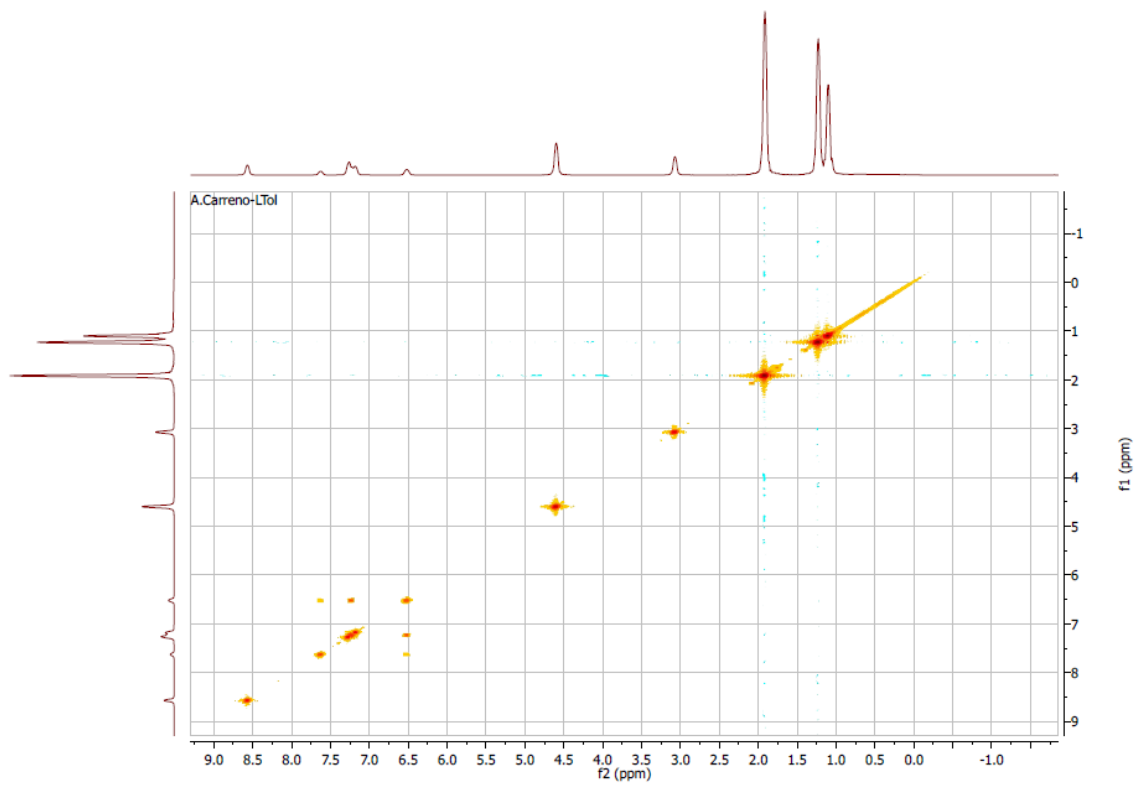

**Figure S16.** HHCOSY spectrum of **L1** in methanol- $d_4$  at 25 °C.

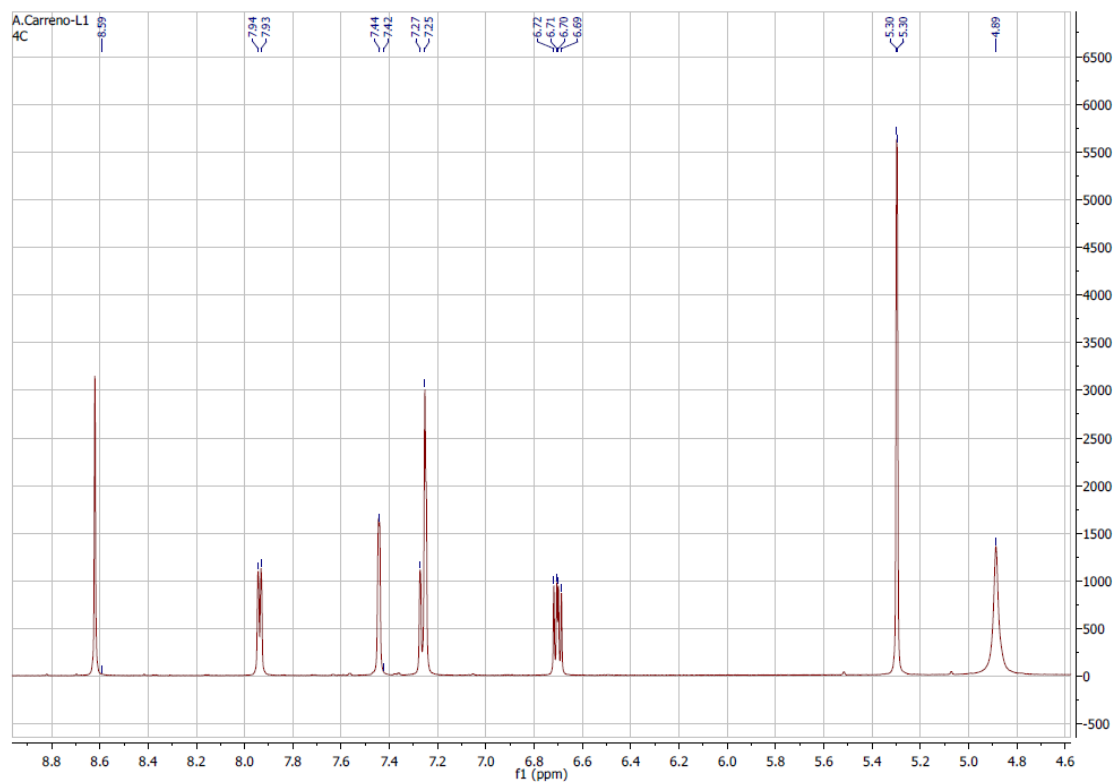

**Figure S17.** Aromatic expanded  $^1\text{H}$ NMR spectrum of L1 in  $\text{CD}_2\text{Cl}_2$  at  $4\text{ }^\circ\text{C}$ .

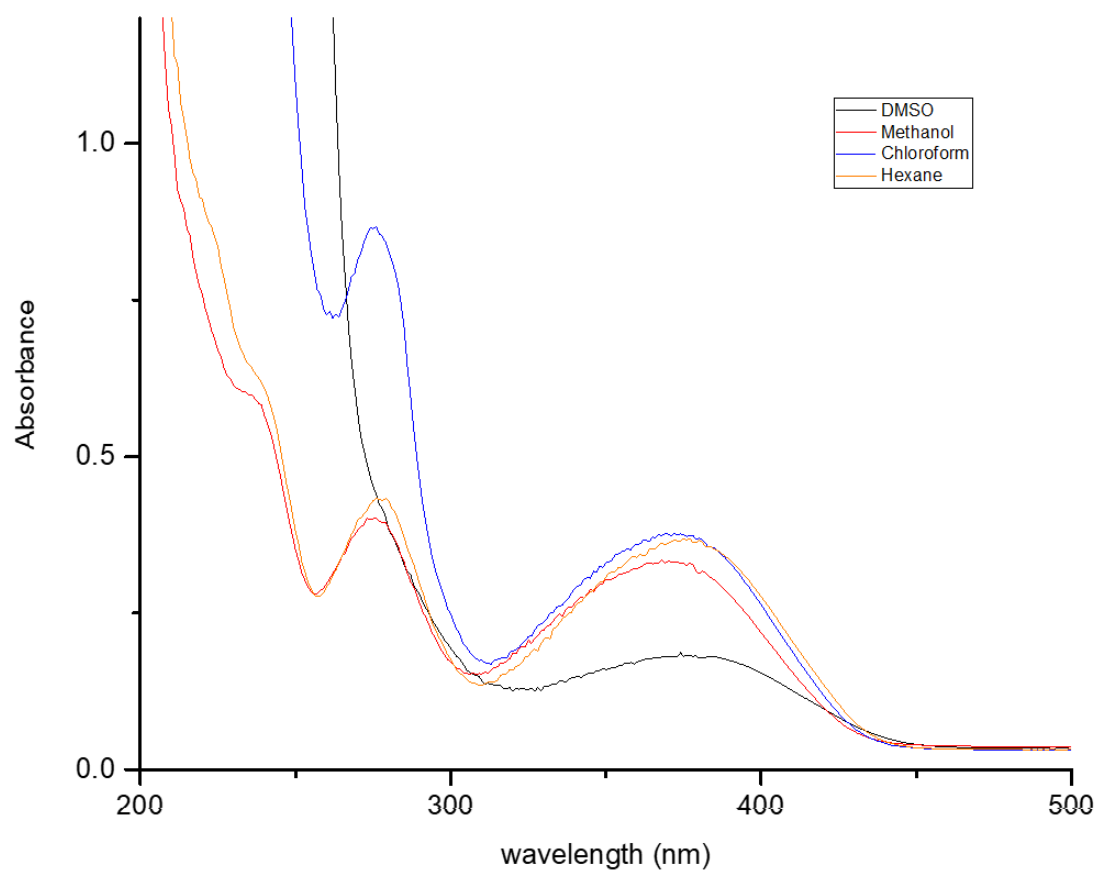

**Figure S18.** Experimental UV-vis spectra in different organic solvents, increasing polarity (hexane, chloroform, methanol, and DMSO) at room temperature.

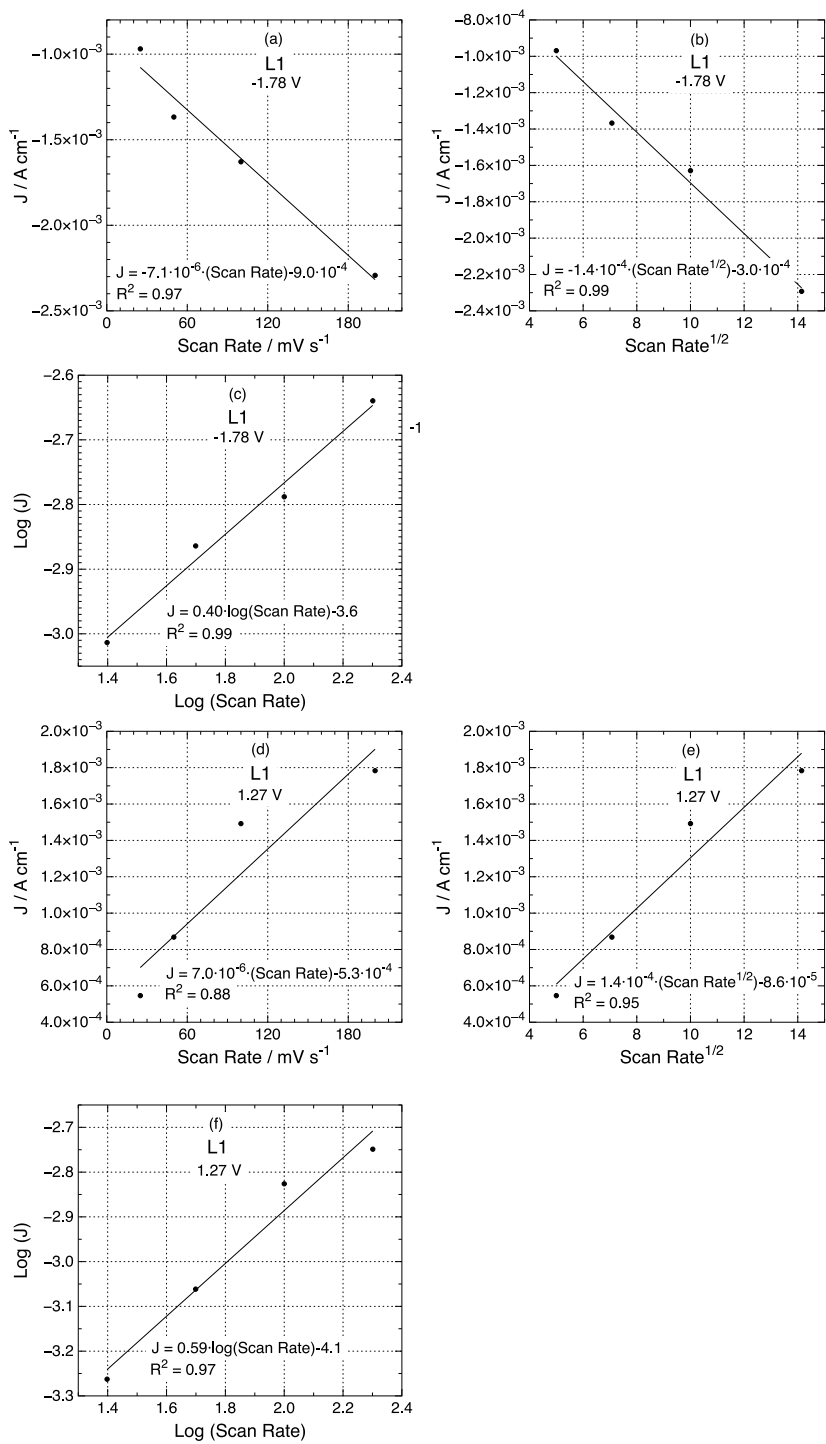

Figure S19. Scan rate analysis for L1 electrochemical processes. Interphase: Same as Figure 3.

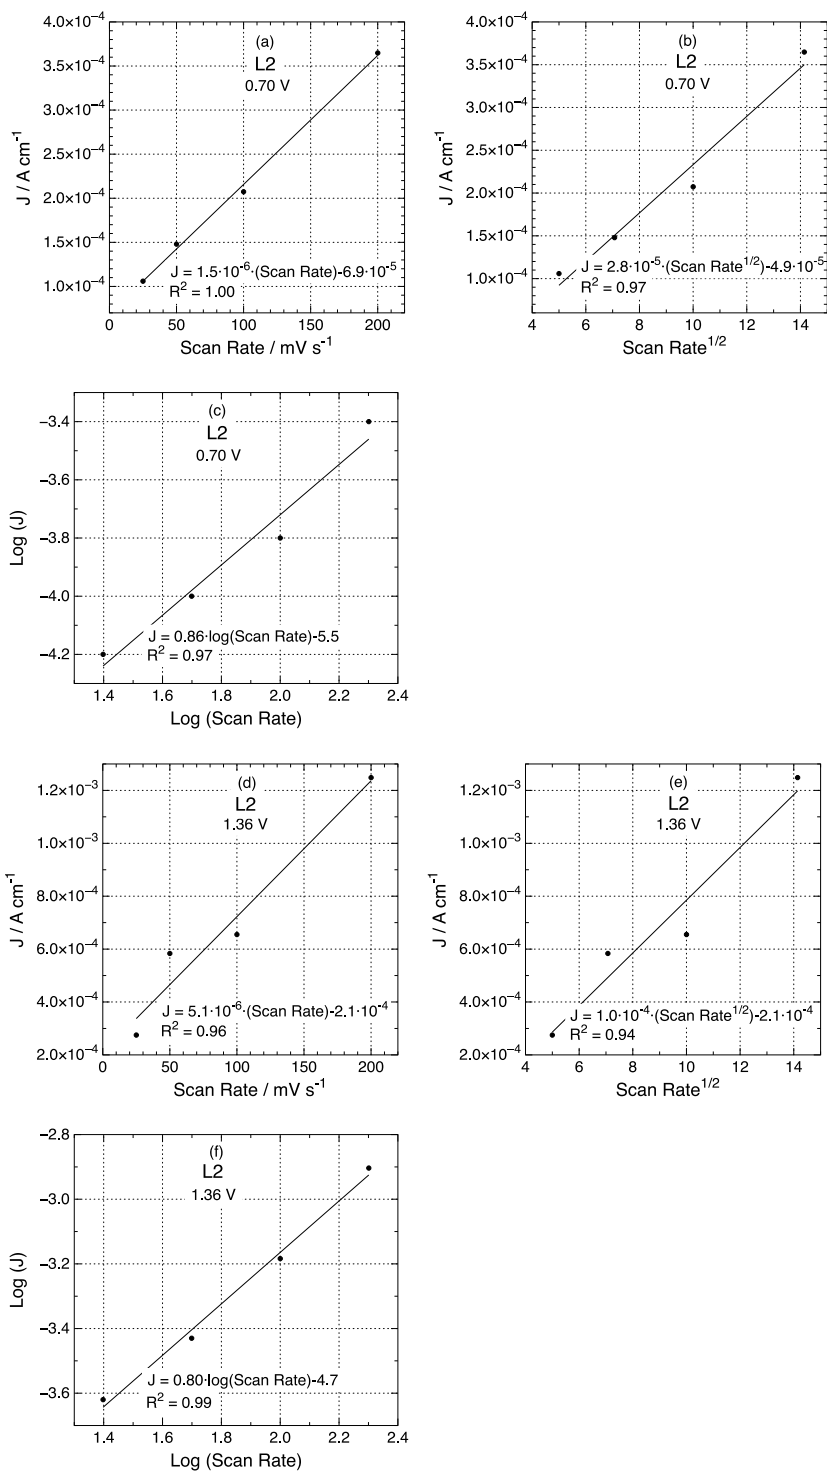

**Figure S20.** Scan Rate analysis for L2 electrochemical processes. Interphase: Same as Figure 3.

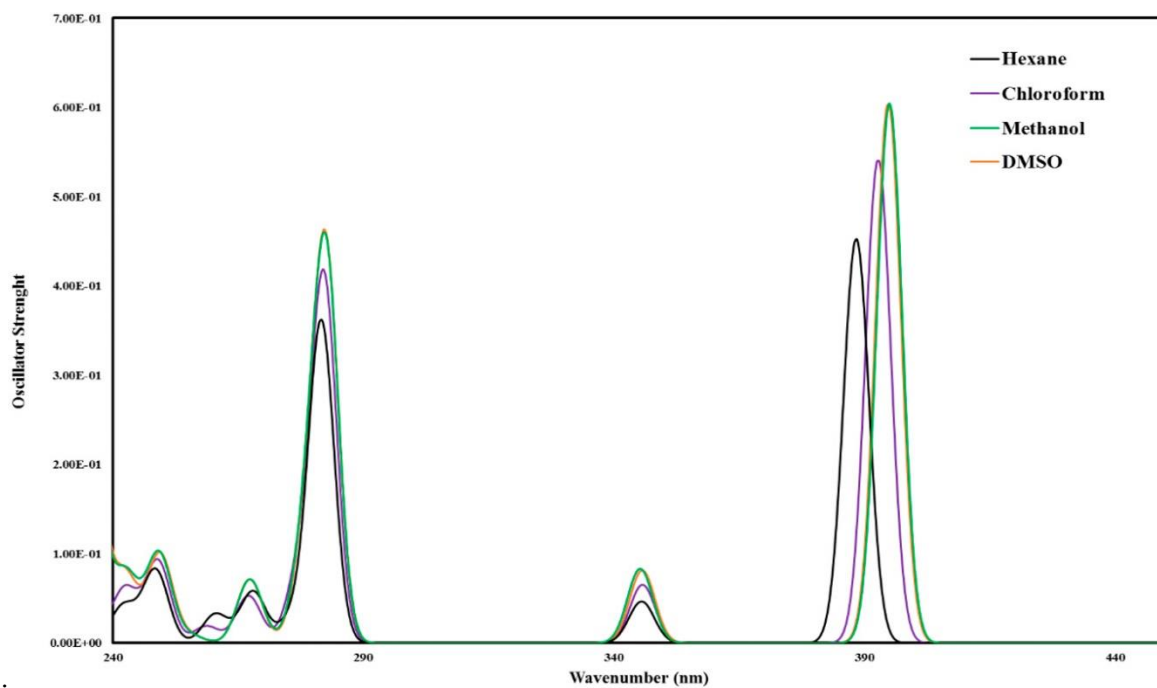

**Figure S21.** Calculated UV-vis absorption spectra for L1 in different implicit solvents with increasing polarity: hexane, chloroform, methanol, and DMSO.

TD-DFT calculations were performed using the standard CAM-B3LYP/TZ2P level of theory. Solvation effects, simulated by the conductor-like screening model (COSMO) [1, 2].

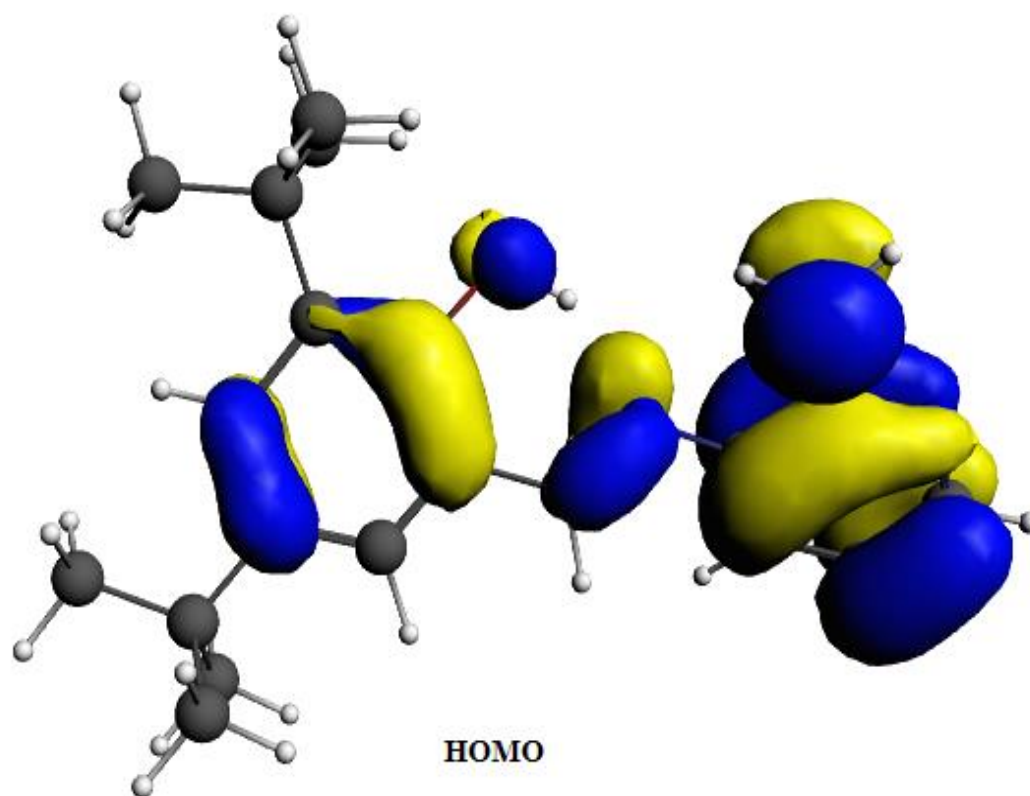

**Figure S22.** Isosurface plots of the HOMO for L1.

Theoretical computations were performed using density functional theory (DFT) with the B3LYP hybrid exchange/correlation (XC) functional and Gaussian basis set 6-311+G (2d,p) [3, 4].

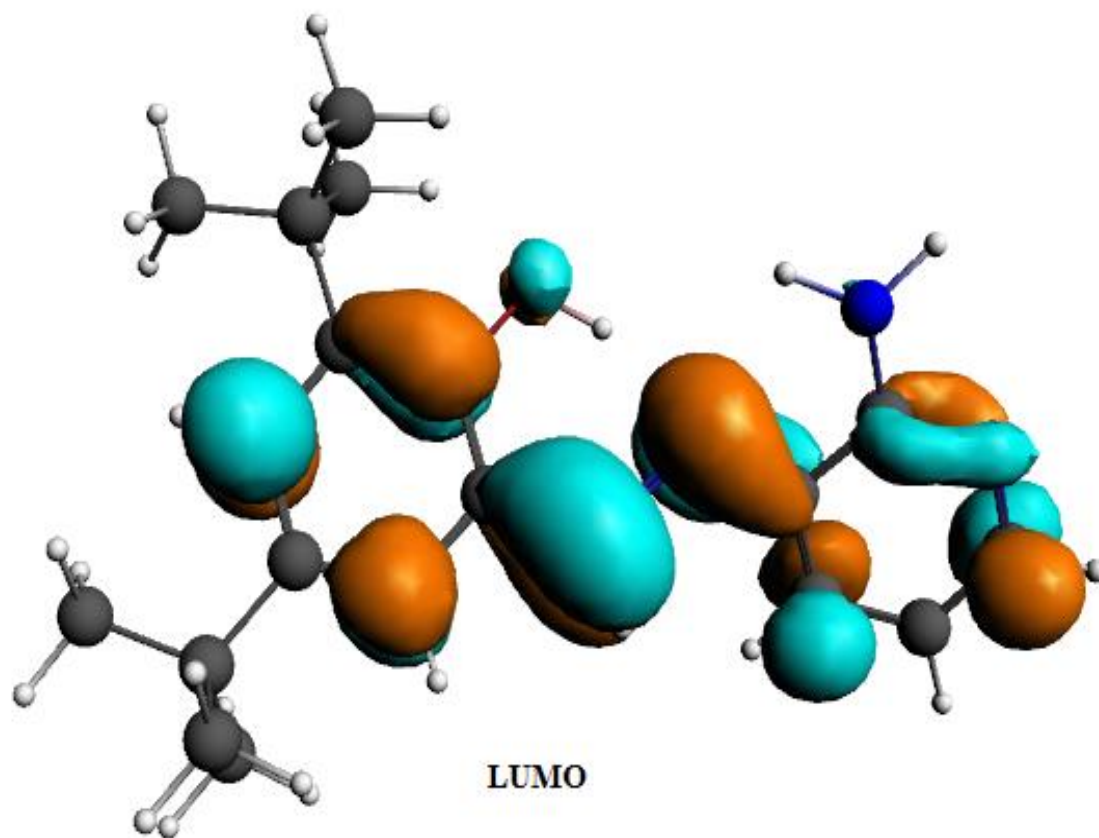

**Figure S23.** Isosurface plots of the LUMO for L1.

Theoretical computations were performed using density functional theory (DFT) with the B3LYP hybrid exchange/correlation (XC) functional and Gaussian basis set 6-311+G (2d,p) [3, 4].



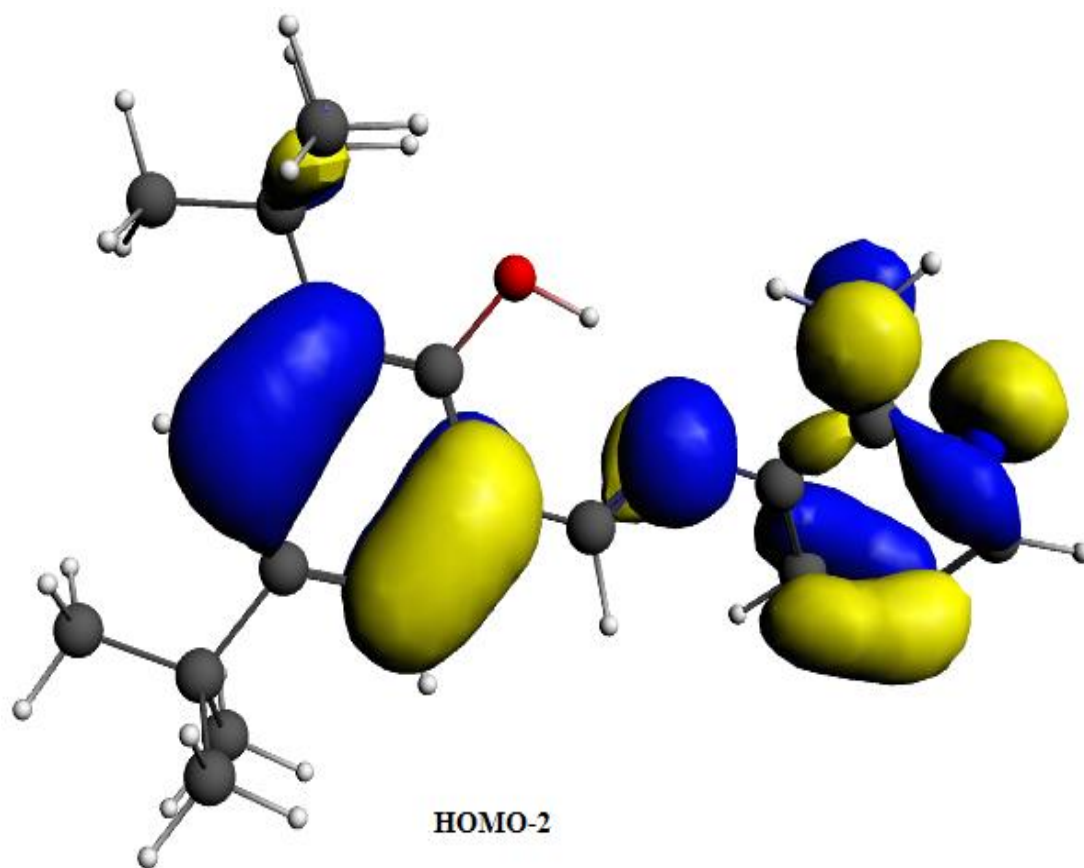

**Figure S24.** Isosurface plots of the HOMO-2 for L1.

Theoretical computations were performed using density functional theory (DFT) with the B3LYP hybrid exchange/correlation (XC) functional and Gaussian basis set 6-311+G (2d,p) [3, 4].

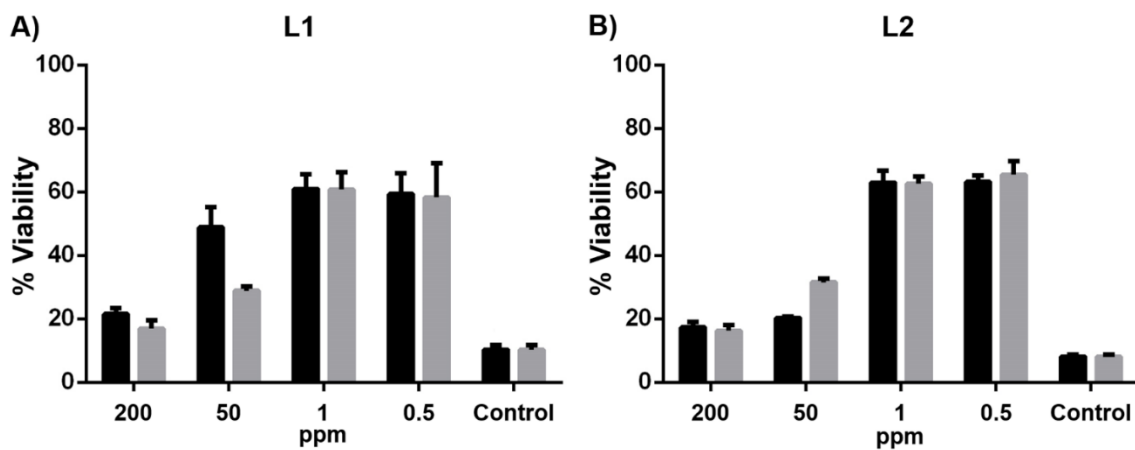

**Figure S25. MTT Assay in HeLa cells.** Cells were incubated 24 h with Schiff bases (A, L1; B, L2) before measuring cell viability. In all cases, compounds were tested at different concentrations (200 ppm + DMSO 50% v/v, 100 ppm + DMSO 25% v/v, 50 ppm + DMSO 12.5% v/v, or 25 ppm + DMSO 6.3% v/v) (black bars). The vehicle alone (DMSO) was also tested (50% v/v, 25% v/v, 12.5% v/v, or 6.3% v/v, respectively) (grey bars). The culture medium alone was used to set 100% viability. Control corresponded to DMSO 100% v/v. All these experiments were performed in biological triplicate.

For MTT assay, see [5, 6].

## Supplementary Tables

Table S1. Positional (x, y, z) and displacement parameters for L1.

| Atom | Np | x       | y       | z        | Occ. | U iso/Beq. | Wyckoff symbol |
|------|----|---------|---------|----------|------|------------|----------------|
| C1   | 4  | 0.33545 | 0.84417 | 0.33556  | 1    | 2.029      | 4e             |
| H1   | 4  | 0.37459 | 0.94429 | 0.24230  | 1    | 2.448      | 4e             |
| C2   | 4  | 0.27364 | 0.96412 | 0.17400  | 1    | 1.966      | 4e             |
| C3   | 4  | 0.21568 | 0.94016 | 0.16745  | 1    | 2.029      | 4e             |
| C4   | 4  | 0.23234 | 0.81587 | -0.03223 | 1    | 1.934      | 4e             |
| C5   | 4  | 0.28514 | 0.68928 | 0.11164  | 1    | 2.1        | 4e             |
| H5   | 4  | 0.37204 | 0.55128 | 0.06276  | 1    | 2.527      | 4e             |
| C6   | 4  | 0.32395 | 0.75014 | 0.19495  | 1    | 1.998      | 4e             |
| C7   | 4  | 0.27403 | 1.14626 | 0.37699  | 1    | 2.527      | 4e             |
| C8   | 4  | 0.35160 | 1.14033 | 0.38834  | 1    | 3.079      | 4e             |
| H8A  | 4  | 0.35507 | 1.06701 | 0.68542  | 1    | 4.579      | 4e             |
| H8B  | 4  | 0.24883 | 1.12978 | 0.65241  | 1    | 4.579      | 4e             |
| H8C  | 4  | 0.37472 | 0.9434  | 0.22987  | 1    | 4.579      | 4e             |
| C9   | 4  | 0.20047 | 1.1425  | 0.29282  | 1    | 3.64       | 4e             |
| H9A  | 4  | 0.11819 | 0.99795 | 0.22291  | 1    | 5.448      | 4e             |
| H9B  | 4  | 0.13265 | 1.35418 | 0.19784  | 1    | 5.448      | 4e             |
| H9C  | 4  | 0.07650 | 0.95712 | 0.15770  | 1    | 5.448      | 4e             |
| C10  | 4  | 0.30881 | 1.12918 | 0.14100  | 1    | 3.774      | 4e             |
| H10A | 4  | 0.37469 | 0.94298 | 0.22511  | 1    | 5.685      | 4e             |
| H10B | 4  | 0.23293 | 1.24282 | 0.46667  | 1    | 5.685      | 4e             |
| H10C | 4  | 0.26412 | 1.3675  | 0.16078  | 1    | 5.685      | 4e             |
| C11  | 4  | 0.42626 | 0.61177 | 0.28914  | 1    | 2.4        | 4e             |
| C12  | 4  | 0.42088 | 0.64482 | 0.50998  | 1    | 3.782      | 4e             |
| H12A | 4  | 0.48387 | 0.60225 | 0.74619  | 1    | 5.685      | 4e             |
| H12B | 4  | 0.37573 | 0.55689 | 0.71548  | 1    | 5.685      | 4e             |
| H12C | 4  | 0.49382 | 0.6468  | 0.56858  | 1    | 5.685      | 4e             |
| C13  | 4  | 0.35129 | 0.55479 | 0.34249  | 1    | 3.735      | 4e             |
| H13A | 4  | 0.37111 | 0.40791 | 0.26188  | 1    | 5.606      | 4e             |
| H13B | 4  | 0.28340 | 0.33962 | 0.38812  | 1    | 5.606      | 4e             |
| H13C | 4  | 0.35608 | 0.43213 | 0.18627  | 1    | 5.606      | 4e             |
| C14  | 4  | 0.47336 | 0.64105 | 0.18316  | 1    | 3.822      | 4e             |
| H14A | 4  | 0.45257 | 0.6605  | 0.26729  | 1    | 5.764      | 4e             |

| Atom | Np | x        | y       | z        | Occ. | U iso/Beq. | Wyckoff symbol |
|------|----|----------|---------|----------|------|------------|----------------|
| H14B | 4  | 0.45261  | 0.65627 | 0.26560  | 1    | 5.764      | 4e             |
| H14C | 4  | 0.45239  | 0.65962 | 0.25737  | 1    | 5.764      | 4e             |
| C15  | 4  | 0.18988  | 0.67598 | -0.03215 | 1    | 2.171      | 4e             |
| H15  | 4  | 0.25215  | 0.64211 | -0.06477 | 1    | 2.606      | 4e             |
| C16  | 4  | 0.06221  | 0.88112 | -0.31840 | 1    | 2.361      | 4e             |
| C17  | 4  | 0.08584  | 0.75669 | -0.24797 | 1    | 2.219      | 4e             |
| C18  | 4  | 0.05118  | 0.66686 | -0.19538 | 1    | 2.645      | 4e             |
| H18  | 4  | 0.04209  | 0.59234 | 0.22390  | 1    | 3.158      | 4e             |
| C19  | 4  | -0.00149 | 0.60163 | -0.34370 | 1    | 3.024      | 4e             |
| H19  | 4  | 0.06203  | 0.64534 | -0.52461 | 1    | 3.632      | 4e             |
| C20  | 4  | -0.03555 | 0.67756 | -0.57434 | 1    | 3.135      | 4e             |
| H20  | 4  | 0.07526  | 0.65881 | -0.54724 | 1    | 3.79       | 4e             |
| N1   | 4  | 0.13502  | 0.81102 | -0.07618 | 1    | 2.282      | 4e             |
| N2   | 4  | 0.00625  | 0.79541 | -0.54461 | 1    | 2.803      | 4e             |
| N3   | 4  | 0.09912  | 0.973   | -0.36931 | 1    | 2.914      | 4e             |
| H103 | 4  | 0.19755  | 0.93669 | -0.25866 | 1    | 3.474      | 4e             |
| H203 | 4  | 0.13583  | 0.88432 | -0.54149 | 1    | 3.474      | 4e             |
| O1   | 4  | 0.16787  | 1.00527 | -0.01297 | 1    | 2.787      | 4e             |
| H1A  | 4  | 0.16979  | 0.80368 | -0.31899 | 1    | 4.185      | 4e             |

Crystal system monoclinic, *P21/c* (No 14),  $Z = 4$ ,  $T = 298$  K, radiation CuK $\alpha$ . For U iso/Beq. and Wyckoff symbol, see [7-9].

**Table S2.** UV-Vis absorption spectra of **L1** in different organic solvents with increased polarity at room temperature.

| <b>Solvent</b> | <b>Dielectric (at 20 °C)</b> | <b>Solubility in water (g/100 g)</b> | <b><math>\lambda</math> / nm</b> | <b><math>\epsilon \times 10^3</math> (mol<sup>-1</sup> dm<sup>3</sup> cm<sup>-1</sup>)</b> | <b>Transition nature</b>                          |
|----------------|------------------------------|--------------------------------------|----------------------------------|--------------------------------------------------------------------------------------------|---------------------------------------------------|
| Hexane         | 1.89                         | 0.0014                               | 239                              | 25.63                                                                                      | $\pi \rightarrow \pi^*$                           |
|                |                              |                                      | 277                              | 18.07                                                                                      | $\pi \rightarrow \pi^*$                           |
|                |                              |                                      | 375                              | 15.26                                                                                      | $\pi \rightarrow \pi^*$ and $n \rightarrow \pi^*$ |
| Chloroform     | 4.81                         | 0.795                                | 274                              | 32.68                                                                                      | $\pi \rightarrow \pi^*$                           |
|                |                              |                                      | 372                              | 15.80                                                                                      | $\pi \rightarrow \pi^*$ and $n \rightarrow \pi^*$ |
| Methanol       | 32.7                         | Miscible                             | 236                              | 23.77                                                                                      | $\pi \rightarrow \pi^*$                           |
|                |                              |                                      | 274                              | 16.15                                                                                      | $\pi \rightarrow \pi^*$                           |
|                |                              |                                      | 368                              | 13.69                                                                                      | $\pi \rightarrow \pi^*$ and $n \rightarrow \pi^*$ |
| DMSO           | 47.24                        | 25.3                                 | 378                              | 7.24                                                                                       | $\pi \rightarrow \pi^*$ and $n \rightarrow \pi^*$ |

For Dielectric constant, see [10].

**Table S3.** Electrochemical signals description for pyridine Schiff bases of this study.

| <b>Compound</b> | <b>V vs. SCE</b>                  |                                   |                                    |                                    |
|-----------------|-----------------------------------|-----------------------------------|------------------------------------|------------------------------------|
|                 | <b>E<sub>1</sub><sup>Ox</sup></b> | <b>E<sub>2</sub><sup>Ox</sup></b> | <b>E<sub>1</sub><sup>Red</sup></b> | <b>E<sub>2</sub><sup>Red</sup></b> |
| <b>L1</b>       | +1.27 <sub>(irr-d)</sub>          | —                                 | -1.78 <sub>(irr.d)</sub>           | —                                  |
| <b>L2</b>       | +0.70 <sub>(irr-nd)</sub>         | +1.36 <sub>(irr-nd)</sub>         | —                                  | —                                  |

ox = oxidation, red = reduction, irr = irreversible, rev = reversible, d = diffusional, nd= not diffusional. For Electrochemical signals description see [11].

**Table S4.** Scan Rate study results for determining diffusional control of described electrochemical processes (L1).

|                                                          | <b>-1.78</b> (irr) | <b>+1.27</b> (irr)    |                       |
|----------------------------------------------------------|--------------------|-----------------------|-----------------------|
| <b>Current-density peak vs Scan Rate</b>                 | m                  | $-7.1 \times 10^{-6}$ | $7.0 \times 10^{-6}$  |
|                                                          | n                  | $-9.0 \times 10^{-4}$ | $-5.3 \times 10^{-4}$ |
|                                                          | R <sup>2</sup>     | 0.97                  | 0.88                  |
| <b>Current-density peak vs (Scan Rate)<sup>1/2</sup></b> | m                  | $-1.4 \times 10^{-4}$ | $1.4 \times 10^{-4}$  |
|                                                          | n                  | $-3.0 \times 10^{-4}$ | $-8.6 \times 10^{-5}$ |
|                                                          | R <sup>2</sup>     | 0.99                  | 0.95                  |
| <b>Log(Current-density peak) vs Log(Scan Rate)</b>       | m                  | 0.40                  | 0.59                  |
|                                                          | n                  | -3.6                  | -4.1                  |
|                                                          | R <sup>2</sup>     | 0.99                  | 0.97                  |
| <b>Diffusional or adsorption control?</b>                | <b>Diffusional</b> | <b>Diffusional</b>    |                       |

E<sub>p</sub> corresponds to the oxidation (+) or reduction (-) peak potential value defined by the working-window study.

“irr” and “rev” stand for reversible or irreversible electrochemical process, respectively.

“m”, “n” and “R<sup>2</sup>” are the slope, intercept and linear regression coefficient, respectively.

**Table S5.** Scan Rate study results for determining diffusional control of described electrochemical processes (L2).

| <b>E<sub>p</sub> / V vs SCE</b>                          | <b>+0.70<sub>(irr)</sub></b> | <b>+1.36<sub>(irr)</sub></b> |                       |
|----------------------------------------------------------|------------------------------|------------------------------|-----------------------|
| <b>Scan-rate vs current-density peak</b>                 | m                            | $1.5 \times 10^{-6}$         | $5.1 \times 10^{-6}$  |
|                                                          | n                            | $-6.9 \times 10^{-5}$        | $-2.1 \times 10^{-4}$ |
|                                                          | R <sup>2</sup>               | 1.00                         | 0.96                  |
| <b>(Scan-rate)<sup>1/2</sup> vs current-density peak</b> | m                            | $2.8 \times 10^{-5}$         | $1.0 \times 10^{-4}$  |
|                                                          | n                            | $-4.9 \times 10^{-5}$        | $-2.1 \times 10^{-4}$ |
|                                                          | R <sup>2</sup>               | 0.97                         | 0.94                  |
| <b>Log(Current-density peak) vs Log(Scan Rate)</b>       | m                            | 0.86                         | 0.80                  |
|                                                          | n                            | -5.5                         | -4.7                  |
|                                                          | R <sup>2</sup>               | 0.97                         | 0.99                  |
| <b>Diffusional or adsorption control?</b>                | <b>Adsorption</b>            | <b>Adsorption</b>            |                       |

E<sub>p</sub> corresponds to the oxidation (+) or reduction (-) peak potential value defined by the working-window study.

“irr” and “rev” stand for reversible or irreversible electrochemical process, respectively.

“m”, “n” and “R<sup>2</sup>” are the slope, intercept and linear regression coefficient, respectively.



**Table S6.** Most important transition energies calculated for **L1** in different organic solvents, listed according to increasing polarity.

| <b>Solvent</b>    | $\lambda_{\text{exp}}$ (nm) | $\lambda_{\text{calc}}$ (nm) | <b>Transition</b>               | <b>f</b> | <b>Assignment</b>                                    |
|-------------------|-----------------------------|------------------------------|---------------------------------|----------|------------------------------------------------------|
| <b>Hexane</b>     | 239<br>277                  | 281                          | HOMO-2 $\rightarrow$ LUMO (88%) | 0.360    | $\pi \rightarrow \pi^*$                              |
|                   | 375                         | 388                          | HOMO $\rightarrow$ LUMO (98%)   | 0.450    | $\pi \rightarrow \pi^*$ and<br>$n \rightarrow \pi^*$ |
| <b>Chloroform</b> | 274                         | 282                          | HOMO-2 $\rightarrow$ LUMO (92%) | 0.408    | $\pi \rightarrow \pi^*$                              |
|                   | 372                         | 392                          | HOMO $\rightarrow$ LUMO (99%)   | 0.542    | $\pi \rightarrow \pi^*$ and<br>$n \rightarrow \pi^*$ |
| <b>Methanol</b>   | 236<br>274                  | 282                          | HOMO-2 $\rightarrow$ LUMO (94%) | 0.440    | $\pi \rightarrow \pi^*$                              |
|                   | 368                         | 395                          | HOMO $\rightarrow$ LUMO (99%)   | 0.604    | $\pi \rightarrow \pi^*$ and<br>$n \rightarrow \pi^*$ |
| <b>DMSO</b>       | ---                         | 283                          | HOMO-2 $\rightarrow$ LUMO (93%) | 0.430    | $\pi \rightarrow \pi^*$                              |
|                   | 378                         | 401                          | HOMO $\rightarrow$ LUMO (98%)   | 0.605    | $\pi \rightarrow \pi^*$ and<br>$n \rightarrow \pi^*$ |

TD-DFT calculations were performed using the standard CAM-B3LYP/TZ2P level of theory. Solvation effects were simulated by the conductor-like screening model (COSMO).

**Table S7.** Minimal inhibition concentration ( $\mu\text{g/ml}$ ) of L1 (24 h of incubation).

|                   | <b>Bacteria (<i>K. pneumoniae</i>)</b> | <b>Yeast (<i>Rhodotorula spp.</i>)</b> |
|-------------------|----------------------------------------|----------------------------------------|
| <b>L1</b>         | -                                      | -                                      |
| Fluconazole*      | ND                                     | 5.8                                    |
| Chloramphenicol** | 6.25                                   | ND                                     |

- The inhibition was indistinguishable from de vehicle (DMSO) alone. \* Antifungal agent (azole, control).

\*\* Antibacterial agent (antibiotic, control).

## References

1. Yanai, T.; Tew, D. P.; Handy, N. C., A new hybrid exchange–correlation functional using the Coulomb-attenuating method (CAM-B3LYP). *Chemical Physics Letters* **2004**, 393, (1-3), 51-57.
2. Klaumunzer, B.; Kroner, D.; Saalfrank, P., (TD-)DFT calculation of vibrational and vibronic spectra of riboflavin in solution. *J Phys Chem B* **2010**, 114, (33), 10826-34.
3. Bircher, M. P.; Rothlisberger, U., Plane-Wave Implementation and Performance of a-la-Carte Coulomb-Attenuated Exchange-Correlation Functionals for Predicting Optical Excitation Energies in Some Notorious Cases. *J Chem Theory Comput* **2018**, 14, (6), 3184-3195.
4. Plumley, J. A.; Dannenberg, J. J., A comparison of the behavior of functional/basis set combinations for hydrogen-bonding in the water dimer with emphasis on basis set superposition error. *J Comput Chem* **2011**, 32, (8), 1519-27.
5. Yoon, J. M.; Koppula, S.; Huh, S. J.; Hur, S. J.; Kim, C. G., Low concentrations of doxycycline attenuates FasL-induced apoptosis in HeLa cells. *Biological research* **2015**, 48, 38.
6. Schinkovitz, A.; Kaur, A.; Urban, E.; Zehl, M.; Pachnikova, G.; Wang, Y.; Kretschmer, N.; Slaninova, I.; Pauli, G. F.; Franzblau, S. G.; Krupitza, G.; Bauer, R.; Kopp, B., Cytotoxic constituents from *Lobaria scrobiculata* and a comparison of two bioassays for their evaluation. *J Nat Prod* **2014**, 77, (4), 1069-73.
7. Ramkumar, T.; Selvakumar, M.; Vasanthankar, R.; Sathishkumar, A. S.; Narayanasamy, P.; Girija, G., Rietveld refinement of powder X-ray diffraction, microstructural and mechanical studies of magnesium matrix composites processed by high energy ball milling. *Journal of Magnesium and Alloys* **2018**, 6, (4), 390-398.
8. Nespolo, M.; Aroyo, M. I.; Souvignier, B., Crystallographic shelves: space-group hierarchy explained. *J Appl Crystallogr* **2018**, 51, (5), 1481-1491.
9. Janner, A.; Janssen, T.; de Wolff, P. M., Wyckoff positions used for the classification of Bravais classes of modulated crystals. *Acta Crystallographica Section A Foundations of Crystallography* **1983**, 39, (5), 667-670.
10. Mohsen-Nia, M.; Amiri, H.; Jazi, B., Dielectric Constants of Water, Methanol, Ethanol, Butanol and Acetone: Measurement and Computational Study. *Journal of Solution Chemistry* **2010**, 39, (5), 701-708.
11. Lai, B.-C.; Wu, J.-G.; Luo, S.-C., Revisiting Background Signals and the Electrochemical Windows of Au, Pt, and GC Electrodes in Biological Buffers. *ACS Applied Energy Materials* **2019**, 2, (9), 6808-6816.
